# Supplementary material
Source: Springer Nature journal article supplement (https://www.springermedizin.de/resource/supplementary/12958_2010_688_MOESM4_ESM.pdf/9568590)

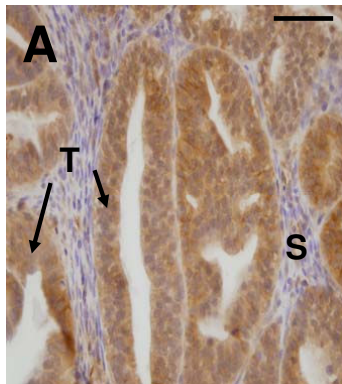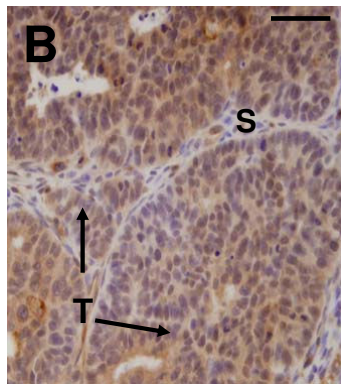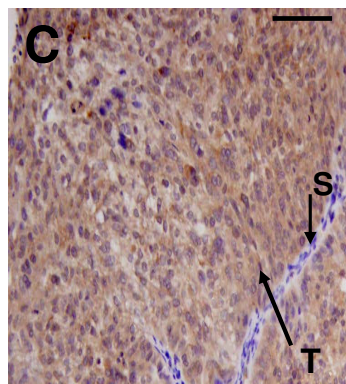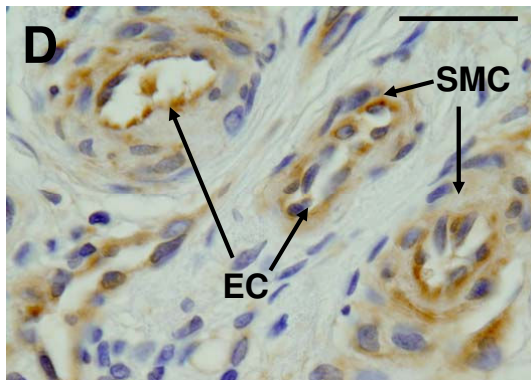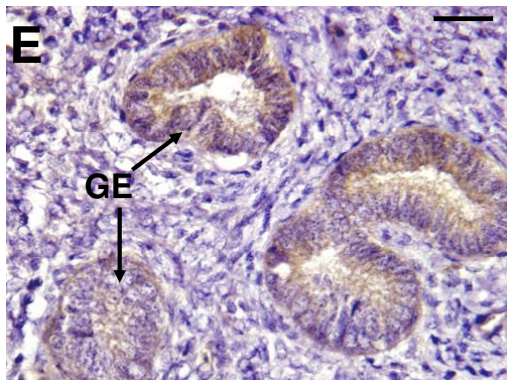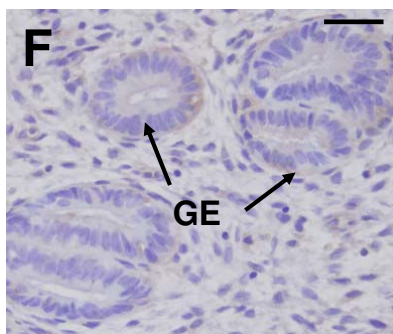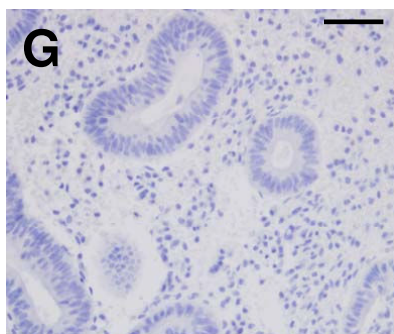

Supplement: MOESM4 [file 9568590]
